# Supplementary material for: PM2.5 Exposure-Linked Mitochondrial Dysfunction Negates SB216763-Mediated Cardio-Protection against Myocardial Ischemia–Reperfusion Injury
Source: MDPI journal article supplement (doi:10.3390/life13112234), 2023-11-20
Supplement: s1 [file s1]

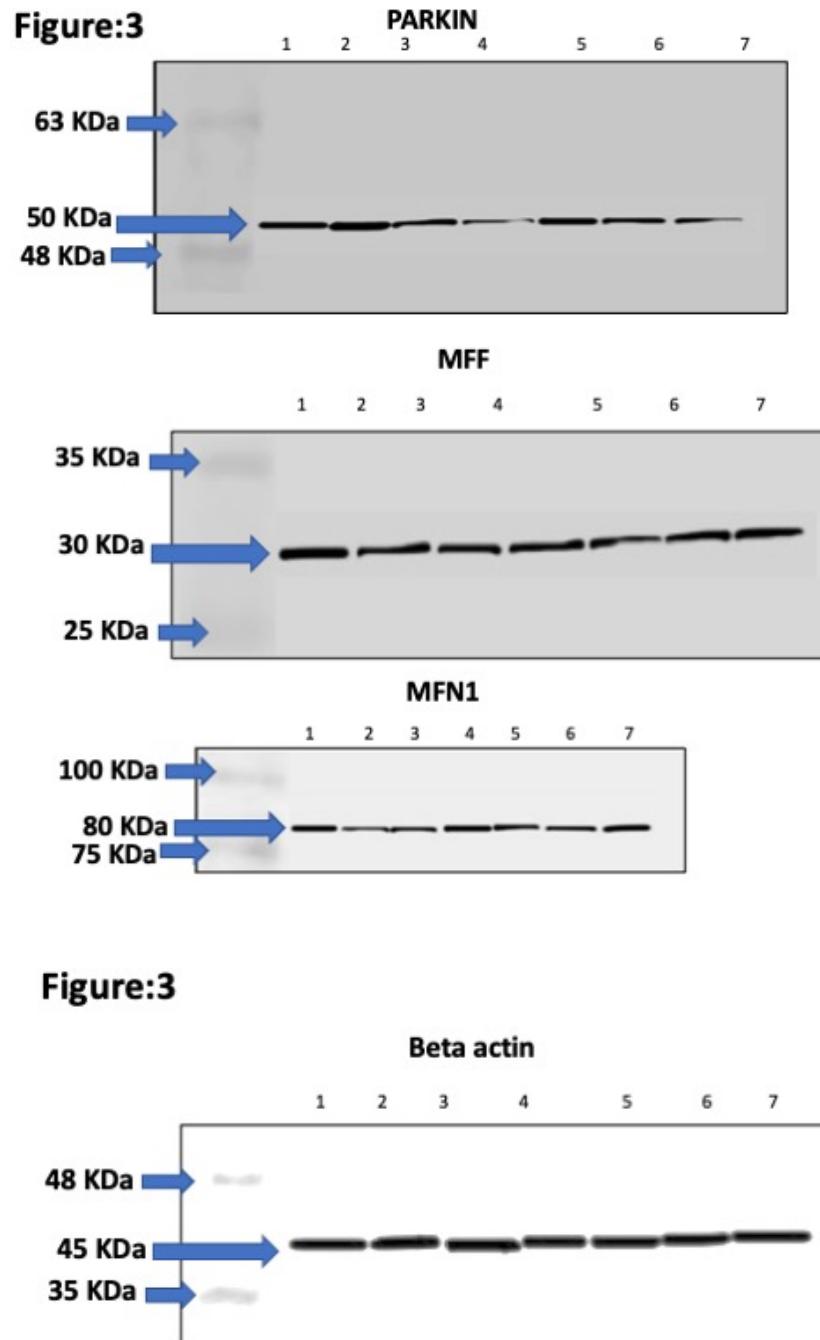

**Figure S1: Showing the original western blot images for Figure 3 with molecular weight markers. The quantification of bands is displayed in the manuscript file.**

**Figure:7**

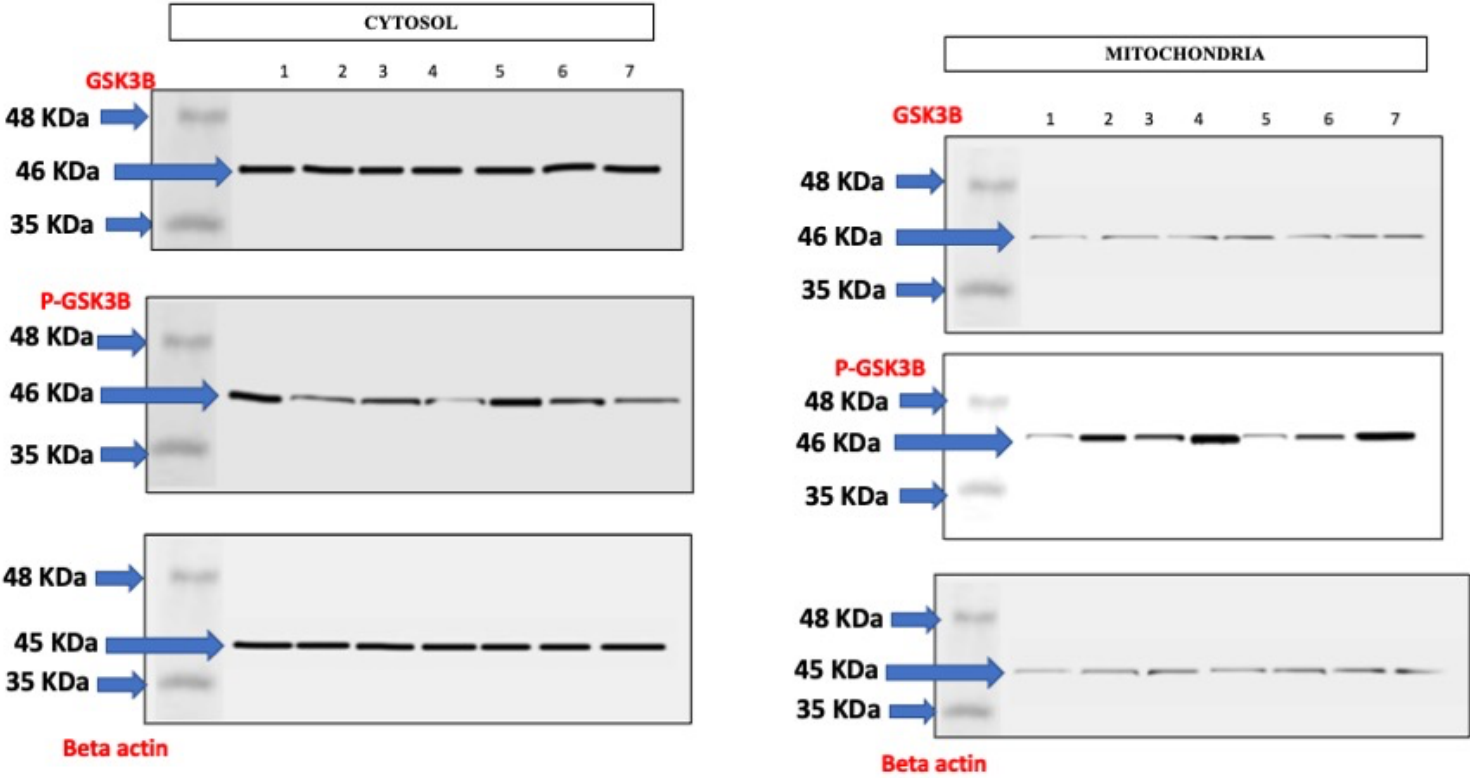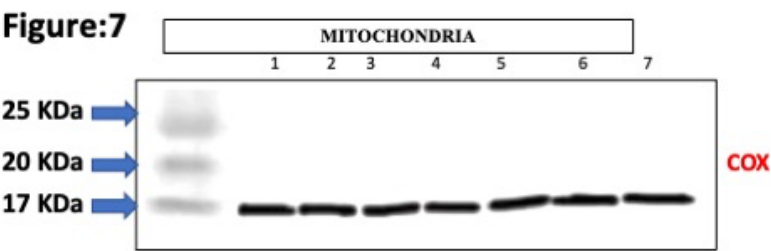

**Figure S2: Showing the original western blot images for Figure 7 with molecular weight markers. The quantification of bands is displayed in the manuscript file.**

**Figure:9**

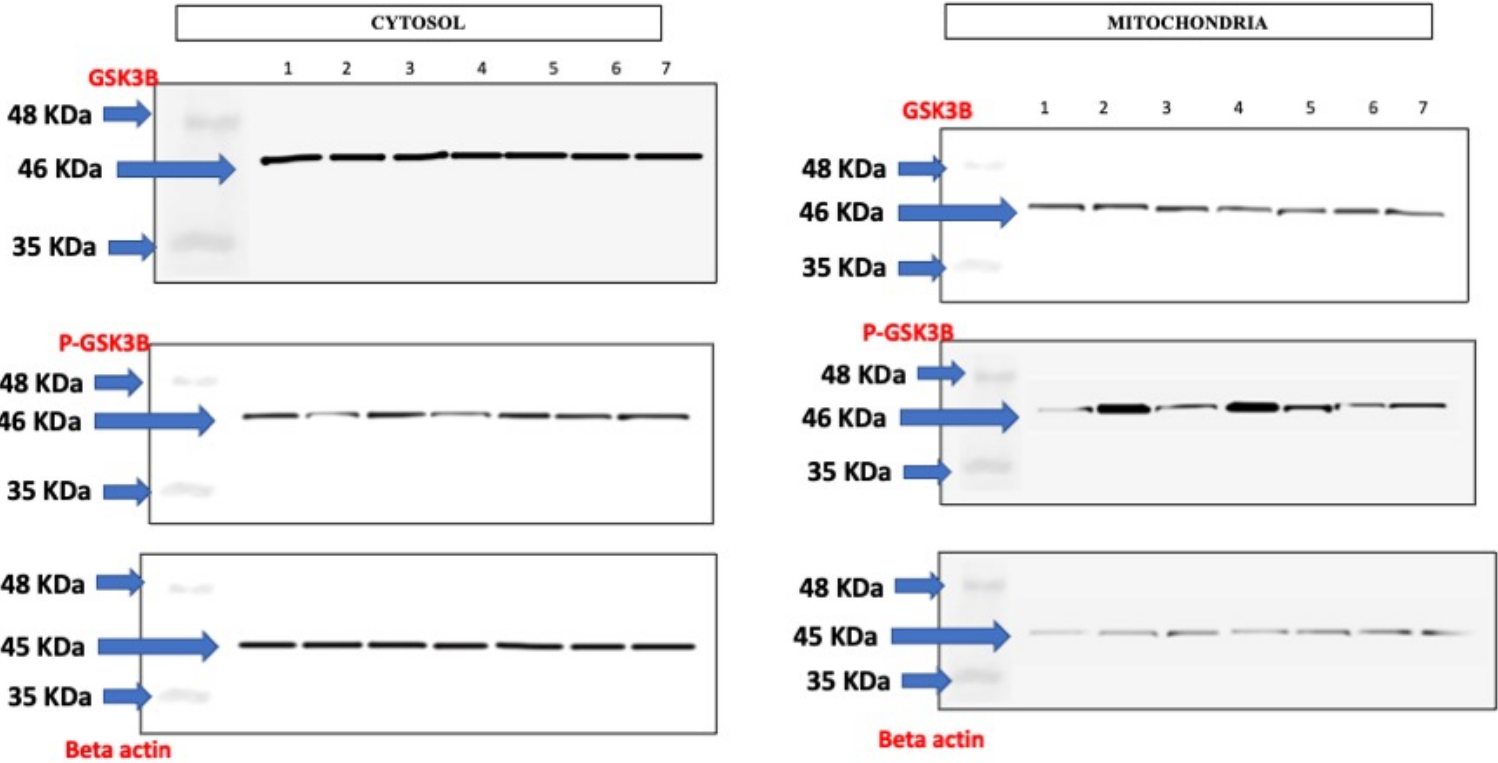

**Figure:9**

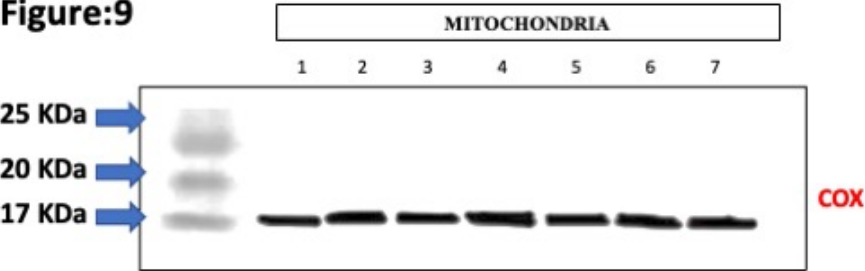

**Figure S3: Showing the original western blot images for Figure 9 with molecular weight markers. The quantification of bands is displayed in the manuscript file.**
